# Supplementary material for: Molecular Characterization of Lipopolysaccharide Binding to Humanα-1-Acid Glycoprotein
Source: Hindawi journal article supplement (doi:10.1155/2012/475153), 2012-01-01

Figure S1

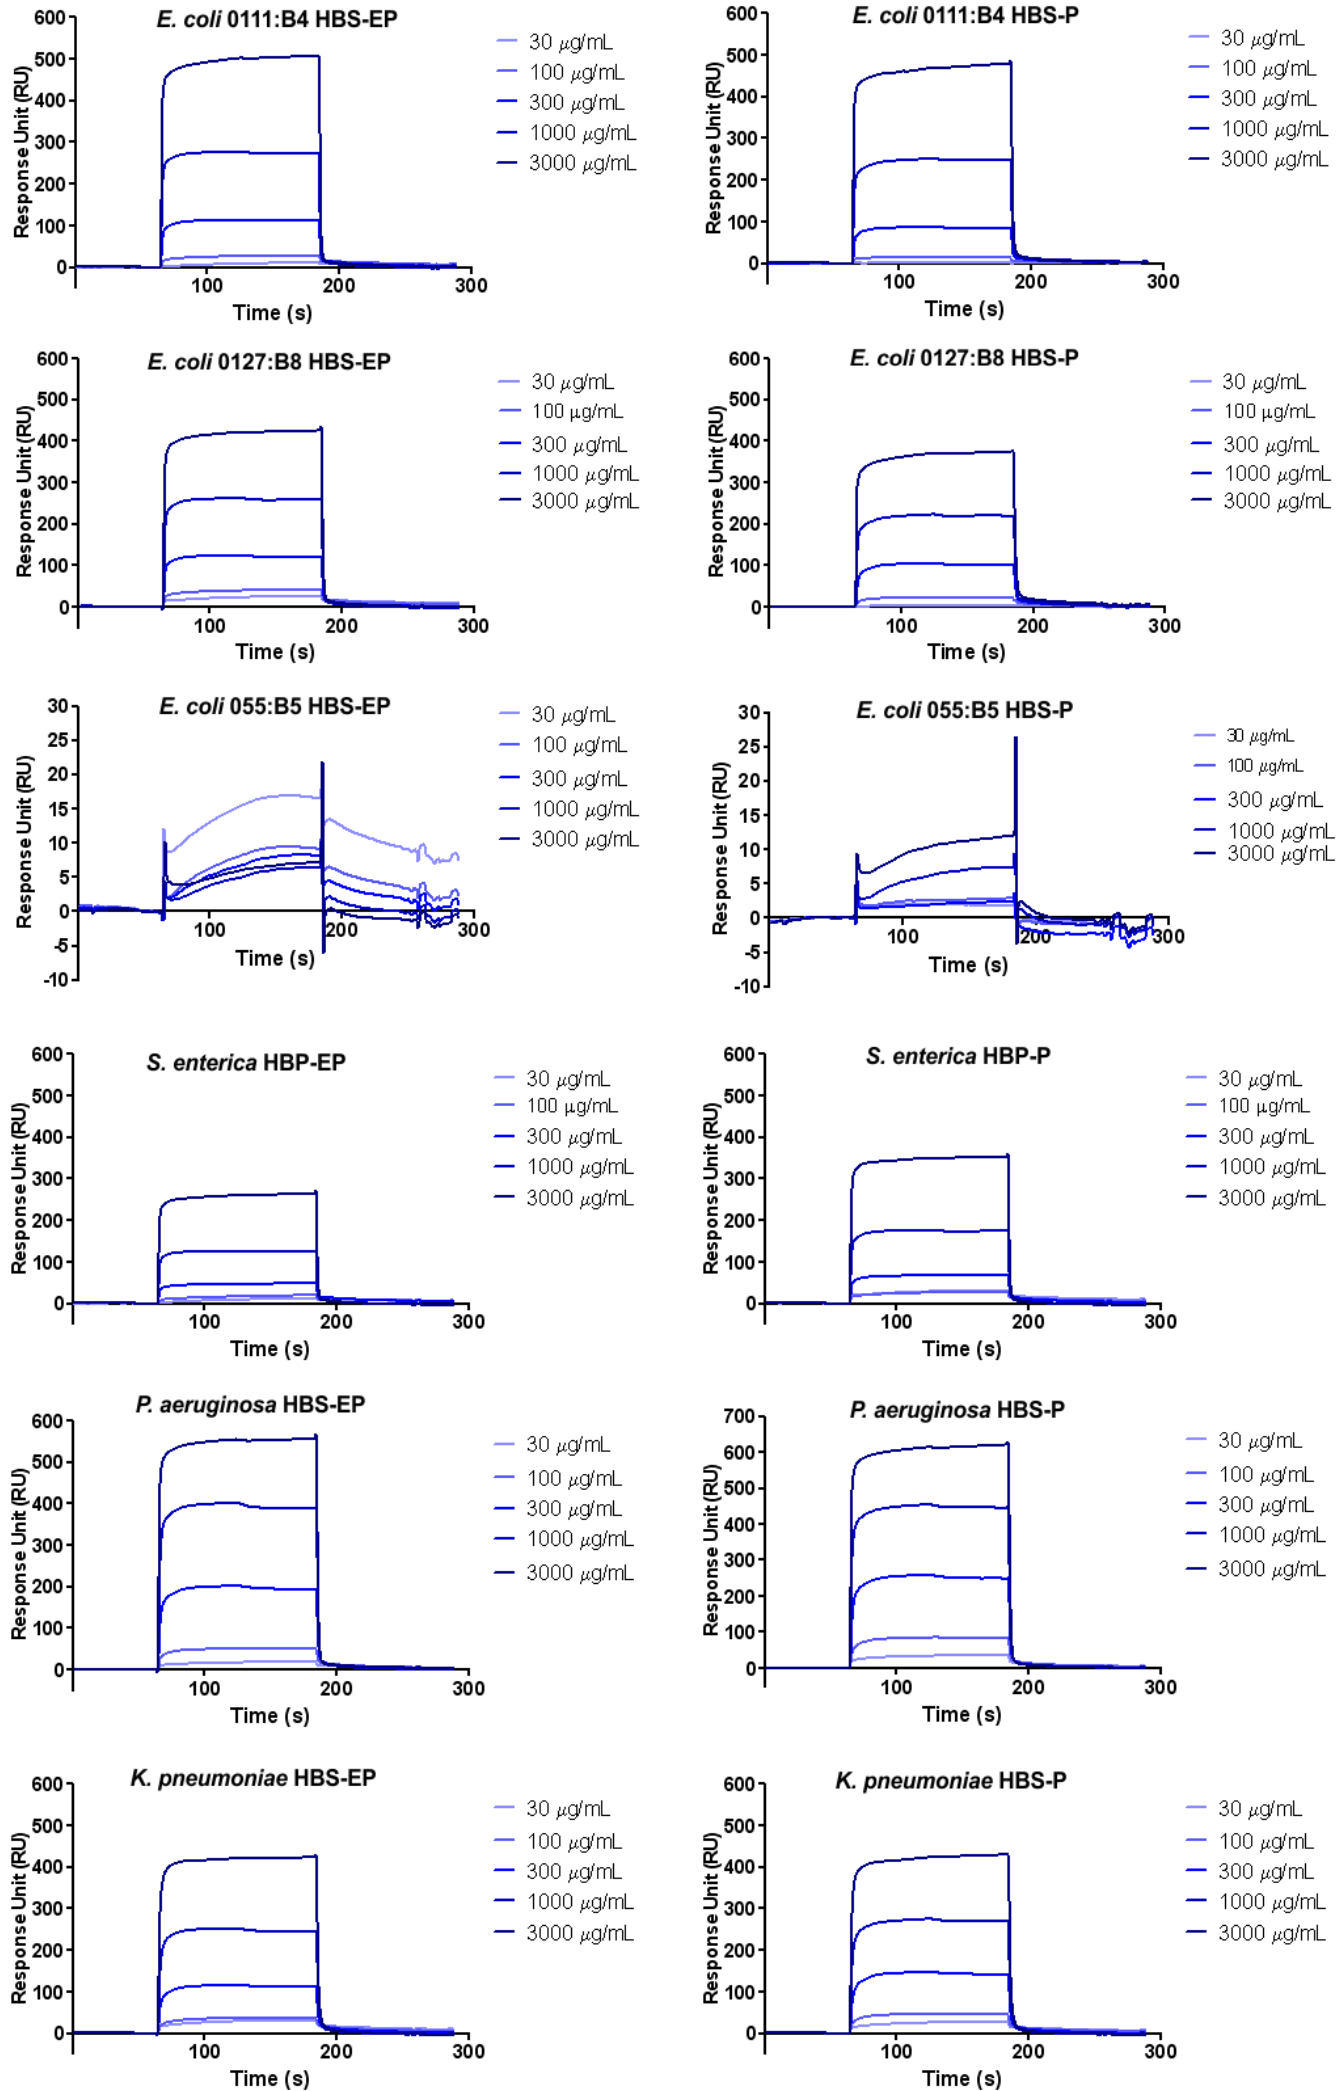

***E. coli* F583 HBS-EP**

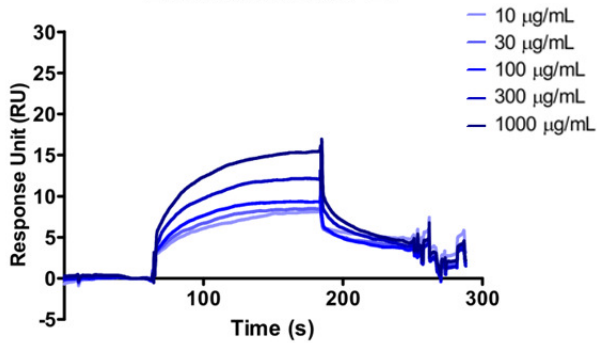

***E. coli* F583 HBS-P**

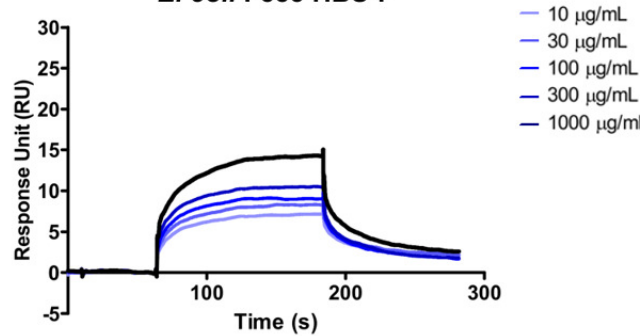

***E. coli* EH100 HBS-EP**

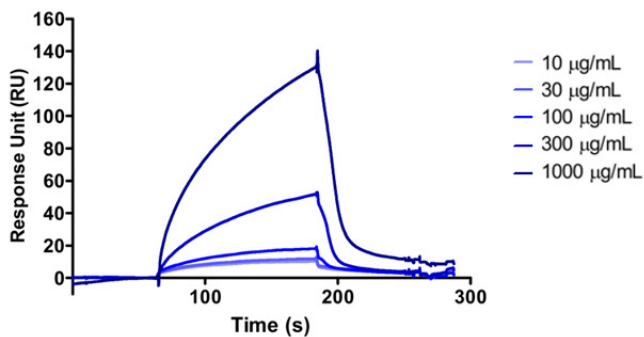

***E. coli* EH100 HBS-P**

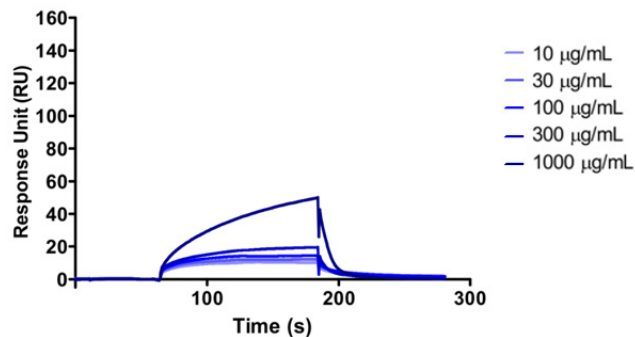

***S. enterica* SL1181 HBS-EP**

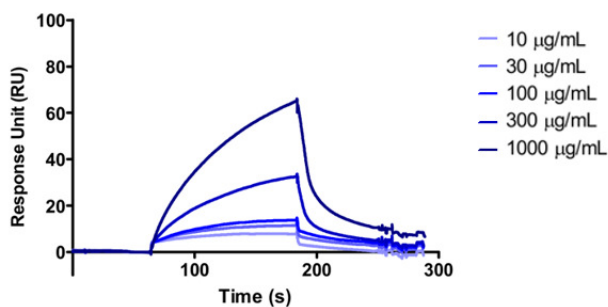

***S. enterica* SL1181 HBS-P**

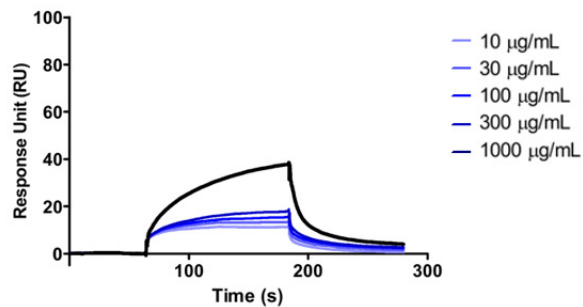

***S. enterica* TV119 HBS-EP**

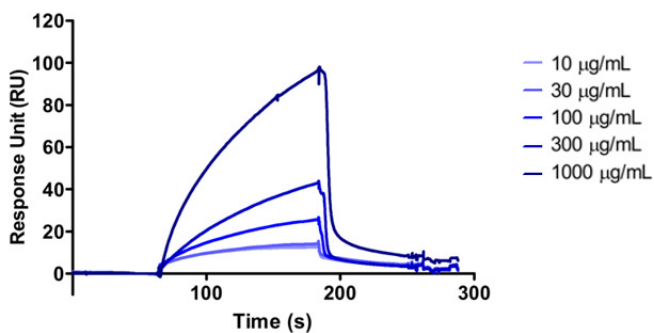

***S. enterica* TV119 HBS-P**

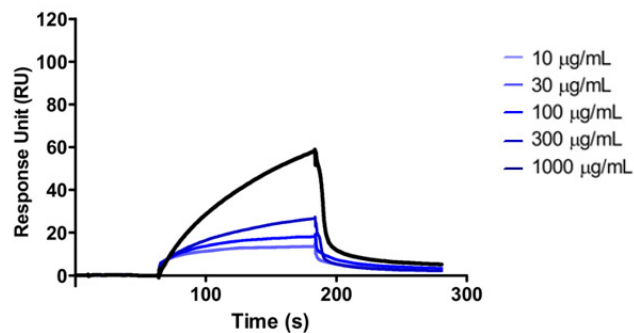

***S. marcescens* HBS-EP**

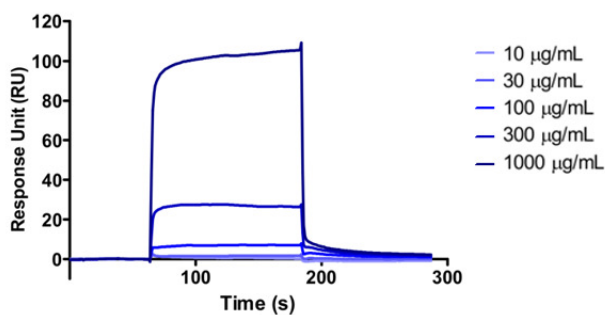

***S. marcescens* HBS-P**

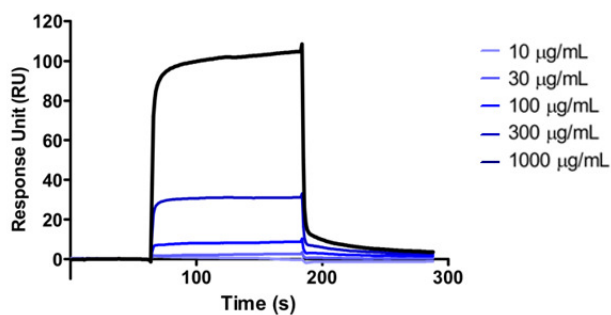

Supplement: f1 [file 475153.f1.pdf]
